# Supplementary material
Source: publisher site journal article supplement (https://www.jstage.jst.go.jp/article/jgam/advpub/0/advpub_2020.01.007/_supplement/_download/advpub_2020.01.007_1.pdf)
Supplement: Supplementary file 1 [file advpub_2020.01.007_1.pdf]

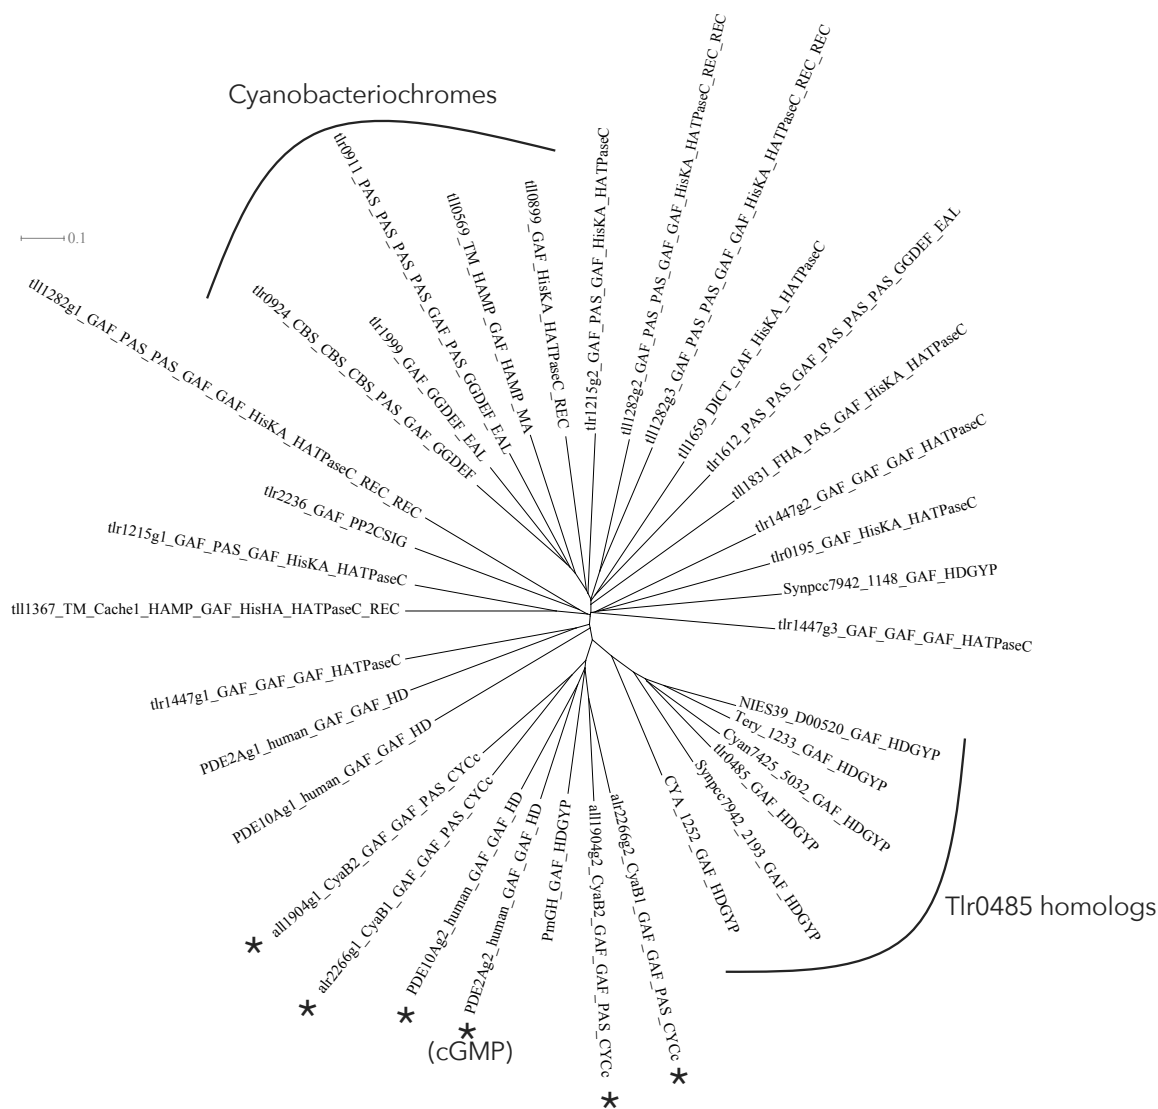

Fig. S2

The cluster analysis of GAF domains. The phylogenetic trees for the GAF domains of Tlr0485 homologs, known cNMP-binding proteins, and all the GAF domain-containing proteins of *Thermosynechococcus elongatus* based on the neighbor-joining method. Sequence labels are protein names followed by the domain compositions of the full-length proteins. \*: cAMP-binding GAF domains.

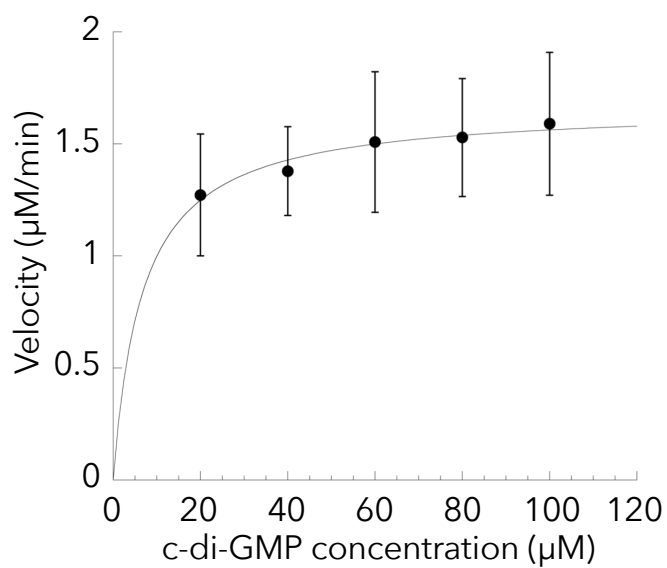

Fig. S3

The substrate concentration dependence curve for the PDE activity of Tlr0485 in the presence of 2 μM cAMP for activation of the enzyme. The reaction velocity is calculated from the amount of the reaction product, pGpG. Shown data are mean  $\pm$  standard deviations of three independent experiments.
